# Supplementary material for: Antifungal Activity of Ageritin, a Ribotoxin-like Protein from Cyclocybe aegerita Edible Mushroom, against Phytopathogenic Fungi
Source: MDPI journal article supplement (doi:10.3390/toxins15090578), 2023-09-18
Supplement: s1 [file s1]

**Supplementary Materials: Antifungal activity of ageritin, ribotoxin-like protein from *Cyclocybe aegerita* edible mushroom, against phytopathogenic fungi**

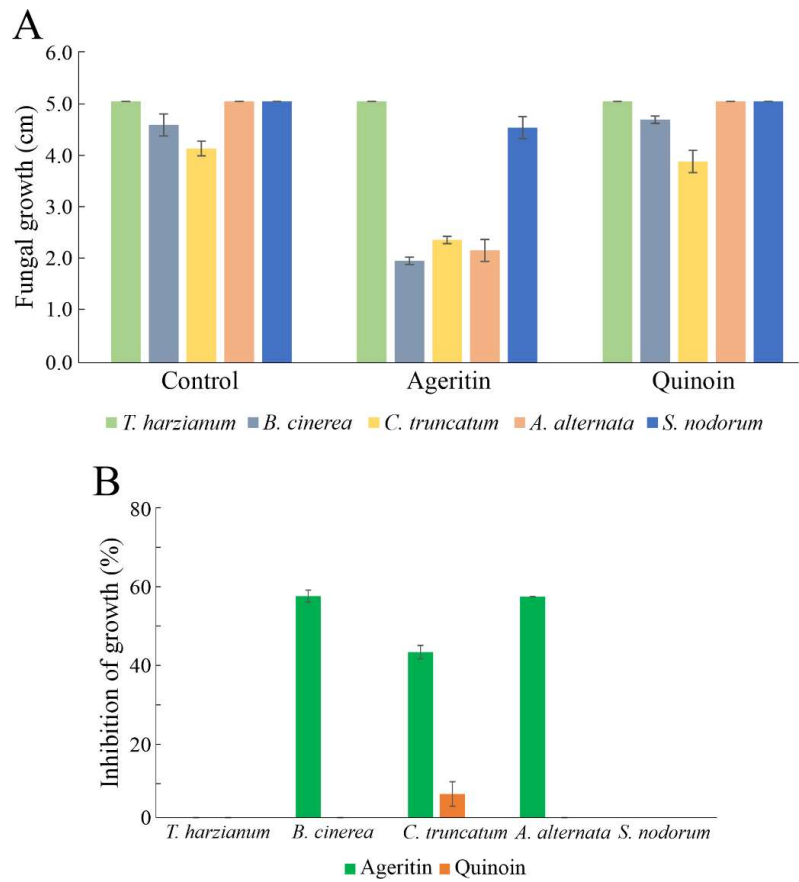

**Figure S1.** Graphical representation of data reported in Figure 2 (see main text). A) Fungal growth (cm) with and without 200 µg/plug (~13.5 nmole ageritin or ~7.0 nmole quinoin); B) Mycelia growth inhibition (percentage) by ageritin and quinoin tested against different fungi.

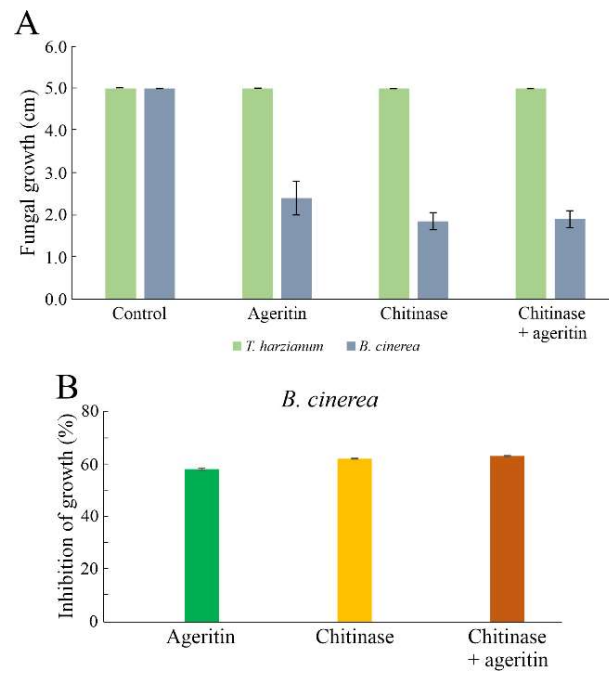

**Figure S2.** Graphical representation of data reported in Figure 3 (see main text). A) Fungal growth (cm) with and without ageritin and chitinase alone or in combination; B) Grown inhibition (percentage) of *B. cinerea*.
